# Supplementary material for: Comparative Proteomic Analysis during the Involvement of Nitric Oxide in Hydrogen Gas-Improved Postharvest Freshness in Cut Lilies
Source: PubMed Central journal article supplement (PMC6320913; doi:10.3390/ijms19123955), 2018-12-09
Supplement: ijms-19-03955-s001.pdf [file ijms-19-03955-s001.pdf]

Supplementary Materials

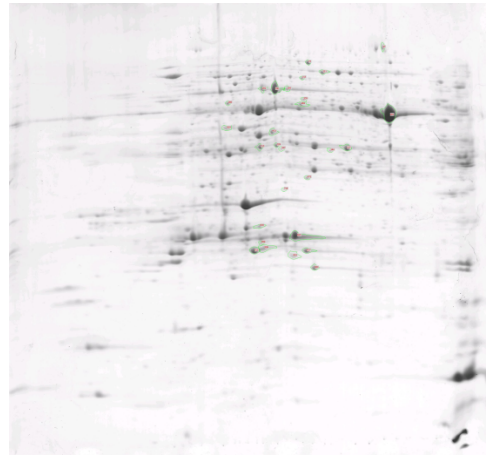

Control

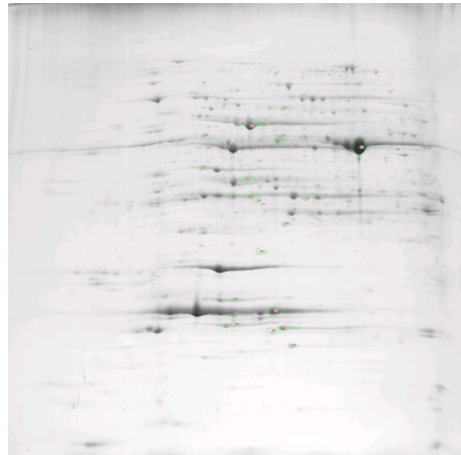

HRW

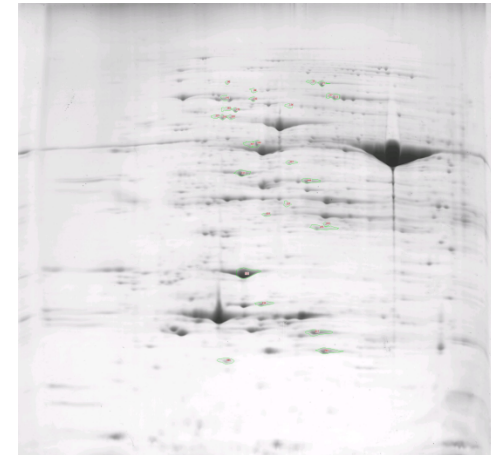

SNP

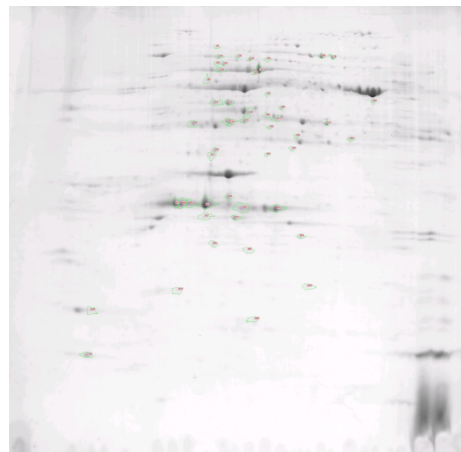

HRW+NaN<sub>3</sub>

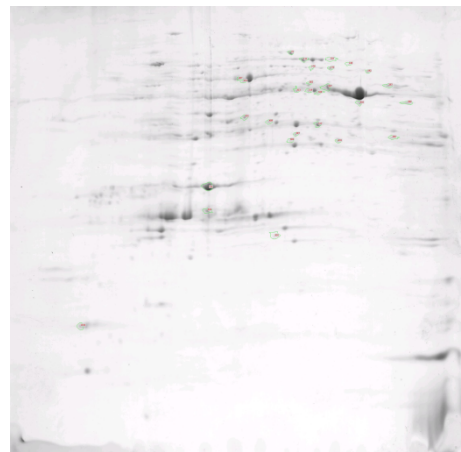

HRW+Tungstate

Figure S1. 2-DE gel images showed to employ protein spot densitometric analysis.

**Table S1.** The sequences of all unique peptides matched to each identified differential protein.

| Spot No. | Protein name                                               | Species                       | Pep. Count | Start Seq.                                                                                                                                      | End Seq.                                                                                                                                          | Sequences of unique peptides                                                                                                                                                                                                                                                                                                                           |
|----------|------------------------------------------------------------|-------------------------------|------------|-------------------------------------------------------------------------------------------------------------------------------------------------|---------------------------------------------------------------------------------------------------------------------------------------------------|--------------------------------------------------------------------------------------------------------------------------------------------------------------------------------------------------------------------------------------------------------------------------------------------------------------------------------------------------------|
| 201      | ATP synthase CF1 alpha subunit (chloroplast)               | <i>Lilium superbum</i>        | 21         | 166<br>17<br>273<br>406<br>120<br>6<br>15<br>481<br>129<br>108<br>177<br>256<br>95<br>255<br>468<br>285<br>26<br>26<br>142<br>385<br>141        | 172<br>22<br>279<br>413<br>128<br>14<br>22<br>491<br>140<br>119<br>188<br>266<br>107<br>266<br>480<br>297<br>41<br>41<br>162<br>405<br>162        | ELIIGDR<br>IEQYNR<br>QMSLLLR<br>ATQNQLAR<br>GEISASESR<br>ADEISNIIR<br>ERIEQYNR<br>TLTEQAEALLK<br>LIESPAPGIISR<br>VINALAKPIDGR<br>TAVATDTILNQK<br>HTLIYDDLK<br>IAQIPVSEAYLGR<br>RHTLIYDDLK<br>NKPQFQEIISSTK<br>EAYPGDVLYLHSR<br>IVNTGTVLQVGDGIAR<br>IVNTGTVLQVGDGIAR<br>SVYEPLQTGLIAIDAMPIGR<br>LELAQFAELEAFAQFASD LDK<br>RSVYEPLQTGLIAIDAMPI           |
| 259      | ATP synthase alpha subunit, partial (mitochondrion)        | <i>Erythronium dens-canis</i> | 10         | 110<br>87<br>134<br>248<br>49<br>215<br>151<br>134<br>99<br>146                                                                                 | 119<br>97<br>145<br>260<br>64<br>229<br>166<br>150<br>119<br>165                                                                                  | AVDSLVPPIGR<br>VEVKAPGIIER<br>TAIAIDTILNQK<br>EAFPGDVLYLHSR<br>TGSIVDVPAGKALLGR<br>DNGMHALIIYDDLK<br>DVNPLYCVYVAIGQKR<br>TAIAIDTILNQKQMNRSR<br>SVHEPMQTGLKAVDSLVPPIG<br>QMNSRDVNPLYCVYVAIGQK                                                                                                                                                           |
| 202      | ATP synthase CF1 alpha subunit (chloroplast)               | <i>Lilium superbum</i>        | 22         | 166<br>17<br>273<br>406<br>120<br>6<br>15<br>481<br>129<br>108<br>177<br>256<br>129<br>95<br>273<br>255<br>468<br>285<br>26<br>26<br>142<br>141 | 172<br>22<br>279<br>413<br>128<br>14<br>22<br>491<br>140<br>119<br>188<br>266<br>141<br>107<br>284<br>266<br>480<br>297<br>41<br>41<br>162<br>162 | ELIIGDR<br>IEQYNR<br>QMSLLLR<br>ATQNQLAR<br>GEISASESR<br>ADEISNIIR<br>ERIEQYNR<br>TLTEQAEALLK<br>LIESPAPGIISR<br>VINALAKPIDGR<br>TAVATDTILNQK<br>HTLIYDDLK<br>LIESPAPGIISRR<br>IAQIPVSEAYLGR<br>QMSLLLRPPGR<br>RHTLIYDDLK<br>NKPQFQEIISSTK<br>EAYPGDVLYLHSR<br>IVNTGTVLQVGDGIAR<br>IVNTGTVLQVGDGIARGR<br>SVYEPLQTGLIAIDAMPIGR<br>RSVYEPLQTGLIAIDAMPIGR |
| 908      | Photosystem II oxygen evolving complex protein 2 precursor | <i>Fritillaria agrestis</i>   | 5          | 117<br>234<br>27<br>92<br>2                                                                                                                     | 126<br>244<br>42<br>111<br>26                                                                                                                     | EVEFPGQVLR<br>LYICKAQAGDK<br>LVPTIKPSQLICRAQK<br>TNTDFLPYTGDFNLLIPAK<br>ASSACFLHHPSTPATTSTRTPSHR                                                                                                                                                                                                                                                       |
| 284      | ATP synthase CF1 beta subunit, partial (plastid)           | <i>Lilium superbum</i>        | 15         | 192<br>487<br>278<br>249<br>232<br>3<br>2                                                                                                       | 205<br>498<br>291<br>261<br>246<br>18<br>18                                                                                                       | AHGGVSVFGGVGER<br>AMNLEGESNLKK<br>FVQAGSEVSALLGR<br>VGLTALTMAEYFR<br>VALVYQMNEPPGAR<br>INPTTSGLVSTLEEK<br>RINPTTSGLVSTLEEK                                                                                                                                                                                                                             |

|     |                                                                                         |                                |    |                                                                                                                                                                                                         |                                                                                                                                                                                                         |                                                                                                                                                                                                                                                                                                                                                                                                                                                                                                                                 |
|-----|-----------------------------------------------------------------------------------------|--------------------------------|----|---------------------------------------------------------------------------------------------------------------------------------------------------------------------------------------------------------|---------------------------------------------------------------------------------------------------------------------------------------------------------------------------------------------------------|---------------------------------------------------------------------------------------------------------------------------------------------------------------------------------------------------------------------------------------------------------------------------------------------------------------------------------------------------------------------------------------------------------------------------------------------------------------------------------------------------------------------------------|
|     |                                                                                         |                                |    | 110<br>128<br>360<br>88<br>292<br>53<br>179                                                                                                                                                             | 127<br>145<br>378<br>109<br>312<br>73<br>205                                                                                                                                                            | IFNVLGEPVDNLGPVDTR<br>TTSPIHRSAPAFIQLDTK<br>GIYPAVDPLDSTSTMLQPR<br>GMEVIDTGTPLSVVGGATLGR<br>MPSAVGYQPTLSTEMGS LQER<br>DTVGPQINVTCEVQQLLGNRR<br>TVLIMELINNIKAHGGVS                                                                                                                                                                                                                                                                                                                                                               |
| 294 | Ribulose-1,5-bisphosphate<br>carboxylase/oxygenase large subunit, partial (chloroplast) | <i>Heloniopsis kawanoi</i>     | 29 | 301<br>183<br>301<br>291<br>28<br>417<br>299<br>281<br>435<br>213<br>335<br>301<br>17<br>130<br>197<br>142<br>160<br>211<br>446<br>142<br>446<br>232<br>330<br>232<br>335<br>190<br>17<br>254<br><br>37 | 307<br>189<br>307<br>298<br>36<br>426<br>307<br>290<br>445<br>222<br>345<br>311<br>27<br>141<br>208<br>154<br>172<br>222<br>458<br>156<br>460<br>247<br>345<br>248<br>351<br>208<br>36<br>280<br><br>74 | NHGMHFR<br>AVYECLR<br>NHGMHFR<br>AMHAVIDR<br>DTDILAAFR<br>VALEACVQAR<br>QKNHGMHFR<br>DNGLLLHIHR<br>EGNEIIREASK<br>FLFCAEALYK<br>EMTLGFVDLLR<br>NHGMHFRVLAK<br>LTYYPDYETK<br>LEDLRIPTSYSK<br>DDENVNSQPFMR<br>TFQGGPHGIQVER<br>YGRPLLGCTIKPK<br>DRFLFCAEALYK<br>WSPELAAACEVWK<br>TFQGGPHGIQVERDK<br>WSPELAAACEVWKEI<br>GHYLNATAGTCEEMIK<br>LEGEREMTLGFVDLLR<br>GHYLNATAGTCEEMIKR<br>EMTLGFVDLLRDDDFIEK<br>GGLDFTKDDENVNSQPFMR<br>LTYYPDYETKDTDILAAFR<br>ELGVPIVMHDYLTGGFTANTSLSHYCR<br>VTPQGPVPEEAGAAVA AESSTGT<br>WTTVWTDGLTSLDR |
| 180 | ATP synthase CF1 alpha subunit (chloroplast)                                            | <i>Lilium superbum</i>         | 21 | 166<br>17<br>273<br>406<br>120<br>6<br>15<br>481<br>129<br>108<br>177<br>256<br>95<br>255<br>468<br>285<br>26<br>26<br>142<br>385<br>141                                                                | 172<br>22<br>279<br>413<br>128<br>14<br>22<br>491<br>140<br>119<br>188<br>266<br>107<br>266<br>480<br>297<br>41<br>41<br>162<br>405<br>162                                                              | ELIIGDR<br>IEQYNR<br>QMSLLLR<br>ATQNQLAR<br>GEISASESR<br>ADEISNIIR<br>ERIEQYNR<br>TLTEQAEALLK<br>LIESPAPGIISR<br>VINALAKPIDGR<br>TAVATDTILNQK<br>HTLIYDDLSK<br>IAQIPVSEAYLGR<br>RHTLIYDDLSK<br>NKPQFQEISSTK<br>EAYPGDV FYLHSR<br>IVNTGTVLQVGDGIAR<br>IVNTGTVLQVGDGIAR<br>SVYEPLQTGLIAIDAMPIGR<br>LELAQFAELEAFAQFASD LDK<br>RSVYEPLQTGLIAIDAMPI                                                                                                                                                                                  |
| 896 | Carbonic anhydrase                                                                      | <i>Musa acuminata subsp.</i>   | 4  | 37<br>1<br>94<br>47                                                                                                                                                                                     | 46<br>13<br>109<br>64                                                                                                                                                                                   | FLVFACADSR<br>MDPVERTSGFER<br>VEYIVVIGHSRCGGIK<br>VCPSVVL SFQPGAEFIVR                                                                                                                                                                                                                                                                                                                                                                                                                                                           |
| 716 | PDZ domain-containing protein                                                           | <i>Cynara cardunculus var.</i> | 6  | 152<br>160<br>288<br>199<br>298<br>297                                                                                                                                                                  | 157<br>169<br>297<br>209<br>312<br>312                                                                                                                                                                  | TMYTIR<br>IGPLLMRMQK<br>SEEFELMCK<br>VREIQMQNYLR<br>YDESFINENALNAIK<br>KYDESFINENALNAIK                                                                                                                                                                                                                                                                                                                                                                                                                                         |

|     |                                                |                                    |    |                                                                                                      |                                                                                                        |                                                                                                                                                                                                                                                                                                                                |
|-----|------------------------------------------------|------------------------------------|----|------------------------------------------------------------------------------------------------------|--------------------------------------------------------------------------------------------------------|--------------------------------------------------------------------------------------------------------------------------------------------------------------------------------------------------------------------------------------------------------------------------------------------------------------------------------|
| 913 | Chlorophyll a-b binding protein, chloroplastic | <i>Musa acuminata subsp.</i>       | 3  | 184<br>171<br>107                                                                                    | 191<br>183<br>123                                                                                      | QYFLGLEK<br>RFQDWANPGSMGK<br>YAMLGAVGAIAP EIFGK                                                                                                                                                                                                                                                                                |
| 431 | Actin                                          | <i>Lilium davidii var. Davidii</i> | 15 | 21<br>42<br>199<br>31<br>362<br>87<br>180<br>241<br>194<br>218<br>71<br>98<br>294<br>293<br>150      | 30<br>52<br>208<br>41<br>374<br>97<br>193<br>256<br>208<br>233<br>86<br>115<br>314<br>314<br>179       | AGFAGDDAPR<br>HTGVMVGMGQK<br>GYMFTTTAER<br>AVFPSIVGRPR<br>AEFDESGPAIVHR<br>IWHHTFYNELR<br>LDLAGRDLTDSLMMK<br>NYELPDGQVITIGAER<br>ILTERGYMFTTTAER<br>LAYVALDYEQELETAK<br>YPIEHGIVSNWDDMEK<br>VAPEEHPVLLTEAPLNPK<br>DLYGNIVLSGGSTMFPGIADR<br>KDLYGNIVLSGGSTMFPGIADR<br>TTGIVLDSGDGVSH TVPIYEGYALP<br>HAILR                       |
| 511 | Glutamine synthetase                           | <i>Tulipa pulchella</i>            | 5  | 296<br>279<br>333<br>141<br><br>53                                                                   | 305<br>291<br>353<br>165<br><br>79                                                                     | HETADINTFK<br>EHISAYGEGNERR<br>RPASNMDPYVVTSMIAETLL<br>WPIGWPIGGYPGPQGPYYCSAGAD<br>K<br>WNYDGSSTGQAPGEDSEVILYPQAI<br>FK                                                                                                                                                                                                        |
| 479 | Actin                                          | <i>Lilium regale</i>               | 16 | 21<br>42<br>199<br>31<br>362<br>87<br>180<br>199<br>241<br>218<br>71<br>98<br>2<br>294<br>293<br>150 | 30<br>52<br>208<br>41<br>374<br>97<br>193<br>212<br>256<br>233<br>86<br>115<br>20<br>314<br>314<br>179 | AGFAGDDAPR<br>HTGVMVGMGQK<br>GYMFTTTAER<br>AVFPSIVGRPR<br>AEFDESGPAIVHR<br>IWHHTFYNELR<br>LDLAGRDLTDSLMMK<br>GYMFTTTAEREIVR<br>NYELPDGQVITIGAER<br>LAYVALDYEQELETAK<br>YPIEHGIVSNWDDMEK<br>VAPEEHPVLLTEAPLNPK<br>ADAEDIQPLVCDNGTGMVK<br>DLYGNIVLSGGSTMFPGIADR<br>KDLYGNIVLSGGSTMFPGIADR<br>TTGIVLDSGDGVSH TVPIYEGYALP<br>HAILR |
| 492 | Monodehydroascorbate reductase                 | <i>Lilium longiflorum</i>          | 14 | 305<br>53<br>311<br>77<br>422<br>40<br>8<br>63<br>166<br>287<br>202<br>249<br>413<br>184             | 310<br>62<br>319<br>85<br>433<br>52<br>22<br>76<br>183<br>304<br>218<br>269<br>433<br>201              | LYNEIR<br>AYLFPQGAAR<br>RVEHVDHAR<br>LLPEWYTEK<br>QLITEGLNFASK<br>EAVAPYERPALSK<br>YIIIGGGVSAGYAAR<br>LPGFHVCVGSGER<br>AVIVGGGYIGLELGATLK<br>TSITDVYAVGDVATFPLK<br>LFTAEIAAFYEGYYANK<br>VLDADIVVVGVGGRPLTTLFK<br>LQPAVADPKQLITEGLNFASK<br>INNL DVTMVYPEPWCMR                                                                   |
| 220 | ATP synthase CF1 alpha subunit (chloroplast)   | <i>Lilium superbum</i>             | 19 | 166<br>17<br>406<br>6<br>15<br>481<br>129<br>108<br>177<br>256<br>191                                | 172<br>22<br>413<br>14<br>22<br>491<br>140<br>119<br>188<br>266<br>202                                 | ELIIGDR<br>IEQYNR<br>ATQNQLAR<br>ADEISNIIR<br>ERIEQYNR<br>TLTEQAEALLK<br>LIESPAPGIISR<br>VINALAKPIDGR<br>TAVATDTILNQK<br>HTLIHYDDLK<br>NVICVYVAIGQK                                                                                                                                                                            |

|      |                                                                                      |                               |    |                                                                                                          |                                                                                                            |                                                                                                                                                                                                                                                                                                                                                               |
|------|--------------------------------------------------------------------------------------|-------------------------------|----|----------------------------------------------------------------------------------------------------------|------------------------------------------------------------------------------------------------------------|---------------------------------------------------------------------------------------------------------------------------------------------------------------------------------------------------------------------------------------------------------------------------------------------------------------------------------------------------------------|
|      |                                                                                      |                               |    | 95<br>468<br>189<br>285<br>26<br>142<br>385<br>141                                                       | 107<br>480<br>202<br>297<br>41<br>162<br>405<br>162                                                        | IAQIPVSEAYLGR<br>NKPQFQEISSTK<br>GKNVICVYVAIGQK<br>EAYPGDVVYFYLHSR<br>IVNTGTVLQVGDGIAR<br>SVYEPLQTGLIAIDAMIPIGR<br>LELAQFAELEAFAQFASDLDK<br>RSVYEPLQTGLIAIDAMIPIGR                                                                                                                                                                                            |
| 988  | Ribulose-1,5-bisphosphate carboxylase/oxygenase large subunit, partial (chloroplast) | <i>Gagea wilczekii</i>        | 12 | 13<br>284<br>115<br>2<br>182<br>127<br>196<br>300<br>217<br>431<br>266<br>22                             | 21<br>292<br>126<br>12<br>193<br>139<br>207<br>314<br>232<br>446<br>283<br>59                              | DTDILAAFR<br>QKNHGIHFR<br>LEDLRIPASYSK<br>LTYYPDPYETK<br>DDENVNSQPFMR<br>TFQGPPHGIQVER<br>DRFLFCAEAIYK<br>MSGGDHIHSGTVVVGK<br>GHYLNATAGTCEEMMK<br>WSPELAAACEVWKEIK<br>DNGLLLHIHRAMHAVIDR<br>VTPQPGVPPEEAGAAVAESSTGT<br>WTTVWTDGLTSLDR                                                                                                                         |
| 1060 | Pathogenesis-related protein 10                                                      | <i>Lilium regale</i>          | 7  | 67<br>19<br>53<br>77<br>53<br>31<br>69                                                                   | 76<br>30<br>66<br>92<br>68<br>52<br>92                                                                     | ERLDFVDHEK<br>AAILDWHTLGPK<br>QLNFTSVMPFSYVK<br>FECQSTIIEGGHLGTR<br>QLNFTSVMPFSYVKER<br>LVPEIISSTGEGSDGGAGSVR<br>LDFVDHEKFECQSTIIEGGHLGTR                                                                                                                                                                                                                     |
| 136  | Ribulose-1,5-bisphosphate carboxylase/oxygenase large subunit, partial (chloroplast) | <i>Trillium camschatcense</i> | 9  | 1<br>8<br>279<br>122<br>191<br>212<br>212<br>315<br>295                                                  | 7<br>16<br>287<br>134<br>202<br>227<br>228<br>331<br>314                                                   | TPDYTPK<br>DTDILAAFR<br>QKNHGIHFR<br>TFQGPPHGIQVER<br>DRFLFCAEALYK<br>GHYLNATAGTCEEMMK<br>GHYLNATAGTCEEMMKR<br>EMTLGFVDLLRDDVVLK<br>MSGGDHIHSGTVVVGKLEGER                                                                                                                                                                                                     |
| 985  | ATP synthase beta subunit, partial (chloroplast)                                     | <i>Fritillaria acmopetala</i> | 16 | 203<br>187<br>273<br>374<br>244<br>227<br>1<br>257<br>105<br>355<br>203<br>83<br>287<br>48<br>350<br>452 | 212<br>200<br>286<br>385<br>256<br>241<br>17<br>272<br>122<br>373<br>220<br>104<br>307<br>68<br>373<br>483 | EGNDLYMEMK<br>AHGGVSVFGGVGER<br>FVQAGSEVSALLGR<br>IVGEEHYEIAQR<br>VGLTALTMAEYFR<br>VALVYGQMNPPGAR<br>TTSGLGVSTLEEKNLGR<br>DVNEQDVLLFIDNIFR<br>IFNVLGEPVDNLGPVDTR<br>GIYPAVDPLDSTSTMLQPR<br>EGNDLYMEMKESGVINEK<br>GMEVIDTGTPLSVPVGGATLGR<br>MPSAVGYQPTLSTEMGSLQER<br>DTVGPQINVTCEVQQLLGNNR<br>GLAAKGIYPAVDPLDSTSTMLQPR<br>GFQLILSGELDSLPEQAFYLVGNIDE<br>ATAKAM |
| 142  | ATP synthase CF1 alpha subunit (chloroplast)                                         | <i>Ripogonum album</i>        | 10 | 6<br>129<br>129<br>95<br>468<br>285<br>26<br>1<br>142<br>468                                             | 14<br>140<br>141<br>107<br>480<br>297<br>41<br>14<br>162<br>491                                            | ADEISNIIR<br>LIESPAPGIISR<br>LIESPAPGIISRR<br>IAQIPVSEAYLGR<br>NKPQFQEISSTK<br>EAYPGDVVYFYLHSR<br>IVNTGTVLQVGDGIAR<br>MVTLRAD EISNIIR<br>SVYEPLQTGLIAIDSMIPIGR<br>NKPQFQEISSTKTFTEQAEALLK                                                                                                                                                                     |
| 415  | Glutamine synthetase                                                                 | <i>Erythranthe guttata</i>    | 7  | 295<br>278<br>276<br>18                                                                                  | 304<br>289<br>289<br>33                                                                                    | HETADINTFK<br>EHIAAYGEGNER<br>HKEHIAAYGEGNER<br>IIAEYVWIGGSGMDLR                                                                                                                                                                                                                                                                                              |

|     |                                                         |                                                   |    |                                                                                              |                                                                                              |                                                                                                                                                                                                                                                                                    |
|-----|---------------------------------------------------------|---------------------------------------------------|----|----------------------------------------------------------------------------------------------|----------------------------------------------------------------------------------------------|------------------------------------------------------------------------------------------------------------------------------------------------------------------------------------------------------------------------------------------------------------------------------------|
|     |                                                         |                                                   |    | 332<br>84<br>52                                                                              | 355<br>111<br>78                                                                             | RPASNMDPYIVTSMIAETTLGKQ<br>GNNILVMCDAYTPAGVPIPGNNRH<br>NAAK<br>WNYDGSSTGQAPGEDSEVILYPQAI<br>FK                                                                                                                                                                                     |
| 405 | 6-phosphogluconate<br>dehydrogenase,<br>decarboxylating | <i>Citrus<br/>sinensis</i>                        | 13 | 26<br>353<br>292<br>445<br>455<br>339<br>465<br>339<br>79<br>97<br>209<br>269<br>416         | 34<br>361<br>300<br>454<br>464<br>350<br>477<br>352<br>96<br>113<br>227<br>291<br>441        | GFPISVYNR<br>SIEKGWDLK<br>FLSGLKEER<br>LPANLVQAQR<br>DYFGAHTYER<br>ICSYAQGMNLIR<br>VDMSGSFHTEWFK<br>ICSYAQGMNLIRAK<br>AGSPVDQTIKTLVYMEK<br>GDCHIDGGNEWYENTER<br>SVGKLSNEELQQVFSEWNK<br>WTVQQAADLSVAAPTIESSLDAR<br>VVCLAINSGISTPGMSSSLAYFDTY<br>R                                   |
| 444 | Elongation factor tu                                    | <i>Vigna<br/>angularis<br/>var:<br/>Angularis</i> | 14 | 323<br>472<br>121<br>120<br>199<br>319<br>349<br>150<br>134<br>83<br>44<br>100<br>212<br>165 | 333<br>483<br>131<br>131<br>211<br>333<br>364<br>164<br>149<br>99<br>60<br>119<br>229<br>191 | VGETVDLVGLR<br>TVGAGVIQSIIE<br>YDEIDAAPEER<br>KYDEIDAAPEER<br>QVGVPNMVVFLNK<br>GTIRVGETVDLVGLR<br>ILDEALAGDNVGLLLR<br>HYAHVDCPGHADYVK<br>GITINTATVEYETENR<br>KKPHVNIGTIGHVDHGK<br>LTTLSSSFLQPSTVLRR<br>TTLTAALMALASLGNLSA<br>QDQVDDEELLQLVELEVR<br>NMITGAAQMDGAILVVSAGDGPMP<br>QTK |
| 868 | Chlorophyll a-b<br>binding protein,<br>chloroplastic    | <i>Kalanchoe<br/>fedtschenkoi</i>                 | 7  | 98<br>127<br>96<br>106<br>38<br>239<br>59                                                    | 105<br>134<br>105<br>122<br>56<br>267<br>95                                                  | ELEVIHSR<br>FGEAVWFK<br>NRELEVIHSR<br>WAMLGALGCVFPELLSR<br>TGAKPKPVSSGSPWYGPD<br>R<br>GPLENLADHLADPVNNNAWAYATN<br>FVPGK<br>YLGPFSGEAPSYLTGEFPGDYGWD<br>TAGLSADPETFAK                                                                                                               |
| 517 | Glutamine synthetase                                    | <i>Lolium<br/>perenne</i>                         | 10 | 279<br>259<br>277<br>19<br>1<br>292<br>296<br>85<br>85<br>53                                 | 290<br>272<br>290<br>34<br>18<br>311<br>316<br>106<br>107<br>79                              | EHIAAYGEGNER<br>KDDGFEVIVA AVEK<br>HKEHIAAYGEGNER<br>IIAEYIWIGSGMDLR<br>MALLTDLNLDLSGSTEK<br>LTGKHETADIHTFSWGVANR<br>HETADIHTFSWGVANRGASIR<br>GNNILVMCDCYTPAGEPIPTNK<br>GNNILVMCDCYTPAGEPIPTNKR<br>WNYDGSSTGQAPGEDSEVILYPQAI<br>FK                                                 |
| 866 | Chlorophyll a-b<br>binding protein,<br>chloroplastic    | <i>Carya<br/>cathayensis</i>                      | 5  | 98<br>127<br>38<br>218<br>239                                                                | 105<br>134<br>56<br>238<br>267                                                               | ELEVIHSR<br>FGEAVWFK<br>TAGRPKPVSSGSPWYGPD<br>R<br>NGRLAMFSMFGFFVQAIVTGK<br>GPLENLADHLADPVNNNAWAYATN<br>FVPGK                                                                                                                                                                      |
| 880 | Beta carbonic<br>anhydrase 3                            | <i>Arabidopsis<br/>thaliana</i>                   | 6  | 82<br>110<br>155<br>77<br>187<br>232                                                         | 91<br>120<br>167<br>91<br>203<br>250                                                         | FLVFACADSR<br>NIANMVPPYDK<br>GLMAIEDNTAPTK<br>SQTPKFLVFACADSR<br>QDCKDLSFEDQCTNCEK<br>GAHYDFVKGTFDLWELDFK                                                                                                                                                                          |
| 864 | Chlorophyll a-b<br>binding protein,                     | <i>Kalanchoe<br/>fedtschenkoi</i>                 | 10 | 127<br>96                                                                                    | 134<br>105                                                                                   | FGEAVWFK<br>NRELEVIHSR                                                                                                                                                                                                                                                             |

|      |                                                     |                            |    |                                                                                                                                                                    |                                                                                                                                                                      |                                                                                                                                                                                                                                                                                                                                                                                                                                                                                                           |
|------|-----------------------------------------------------|----------------------------|----|--------------------------------------------------------------------------------------------------------------------------------------------------------------------|----------------------------------------------------------------------------------------------------------------------------------------------------------------------|-----------------------------------------------------------------------------------------------------------------------------------------------------------------------------------------------------------------------------------------------------------------------------------------------------------------------------------------------------------------------------------------------------------------------------------------------------------------------------------------------------------|
|      | chloroplastic                                       |                            |    | 123<br>106<br>106<br>38<br>221<br>239<br>178<br><br>59                                                                                                             | 134<br>122<br>122<br>56<br>238<br>267<br>212<br><br>95                                                                                                               | NGVKFGEAVWFK<br>WAMLGALGCVFPELLSR<br>WAMLGALGCVFPELLSR<br>TGAKPKPVSSGSPWYGPDR<br>LAMFSMFGFFVQAIVTGK<br>GPLENLADHLADPVNNNAWAYATN<br>FVPGK<br>VAGGPLGEVVDPLYPGGSFDPLGL<br>ADDPEAFAELK<br>YLGPFSGEAPSYLTGEFPGDYGWD<br>TAGLSADPETFAK                                                                                                                                                                                                                                                                          |
| 860  | Carbonic anhydrase                                  | <i>Zea mays</i>            | 10 | 474<br>27<br>530<br>311<br>528<br>21<br>392<br>8<br>593<br>165                                                                                                     | 482<br>39<br>545<br>326<br>545<br>39<br>408<br>26<br>609<br>185                                                                                                      | KPELFGPLK<br>LRPPGSGSSGTPR<br>YTGIGSAIEYAVCALC<br>AFTVRNIAAMVPGYDK<br>TKYTGIGSAIEYAVCALC<br>AVLLRLRPPGSGSSGTPR<br>KEHASVPFDDQCSILEK<br>ATTSSIVPACHPRAVLLLR<br>KEHASVPFDDQWSILEK<br>DGAPDNFTFVEDWVRIGSPAK                                                                                                                                                                                                                                                                                                  |
| 542  | Ribulose biphosphate carboxylase/oxygenase activase | <i>Medicago truncatula</i> | 15 | 354<br>305<br>174<br>56<br>305<br>361<br>312<br>361<br>418<br>224<br>1<br>335<br>222<br>280<br>184                                                                 | 360<br>311<br>183<br>66<br>314<br>373<br>323<br>374<br>433<br>238<br>17<br>351<br>238<br>298<br>206                                                                  | VYDDEVR<br>FYWAPTR<br>SFQCELVFAK<br>VSAKIDYNEEK<br>FYWAPTRDDR<br>NWSIGIGVESIGK<br>DDRVGVCQGIFR<br>NWSIGIGVESIGKR<br>YLSEAALGDANDDAIK<br>MCCLFINDLDAGAGR<br>MATSVTIVGAINMAQLK<br>IVDTFPGQSIDFFGALR<br>GKMCCLFINDLDAGAGR<br>VPIIVTGNDFSTLYAPLIR<br>MGISPIMMSAGELESGNAGEPAK                                                                                                                                                                                                                                  |
| 1037 | Type II peroxiredoxin                               | <i>Medicago truncatula</i> | 10 | 214<br>185<br>40<br>47<br>10<br>214<br>164<br>123                                                                                                                  | 222<br>195<br>52<br>62<br>25<br>228<br>181<br>139                                                                                                                    | STLVSNMHR<br>YALLAEDGVVK<br>FNSKPLRFSSSPK<br>FSSSPKISATISVGDK<br>LLSSSTTSLSPKTK<br>STLVSNMHRQVMQTK<br>AIGVELDLSDKPVGLGVR<br>GIDTIACISVNDAFVMK                                                                                                                                                                                                                                                                                                                                                             |
| 304  | ATP synthase CF1 beta subunit, partial (plastid)    | <i>Lilium superbum</i>     | 28 | 146<br>155<br>135<br>76<br>192<br>487<br>278<br>379<br>179<br>206<br>74<br>232<br>23<br>232<br>1<br>262<br>110<br>360<br>88<br>400<br>53<br>292<br>398<br>51<br>53 | 154<br>163<br>145<br>87<br>205<br>498<br>291<br>390<br>191<br>217<br>87<br>246<br>39<br>248<br>18<br>277<br>127<br>378<br>109<br>418<br>73<br>312<br>418<br>73<br>75 | LSIFETGIK<br>VVDLLAPYR<br>SAPAFIQLDTK<br>AVAMSATDGLMR<br>AHGGVSVFVGGVGER<br>AMNLEGESNLKK<br>FVQAGSEVSALLGR<br>IVGEEHYEIAQR<br>TVLIMELINNIK<br>TREGNDLYMEMK<br>VRVAMSATDGLMR<br>VALVYGQMNPPGAR<br>IAQIIGPVLDVVFPPGK<br>VALVYGQMNPPGARMR<br>MRINPTTSGLVSTLEEK<br>DVNEQDVLLFIDNIFR<br>IFNVLGEPVDNLGPVDTR<br>GIYPAVDPLDSTSTMLQPR<br>GMEVIDTGTPLSVVGGATLGR<br>ELQDIIAILGLDELSEEDR<br>DTVGPQINVTCEVQQLLGNNR<br>MPSAVGYQPTLSTEMGS<br>YKELQDIIAILGLDELSEEDR<br>GRDTVGPQINVTCEVQQLLGNNR<br>DTVGPQINVTCEVQQLLGNNRVR |

|     |                                                                                      |                                    |    |                                                                                                                                          |                                                                                                                                             |                                                                                                                                                                                                                                                                                                                                                                                                                                                             |
|-----|--------------------------------------------------------------------------------------|------------------------------------|----|------------------------------------------------------------------------------------------------------------------------------------------|---------------------------------------------------------------------------------------------------------------------------------------------|-------------------------------------------------------------------------------------------------------------------------------------------------------------------------------------------------------------------------------------------------------------------------------------------------------------------------------------------------------------------------------------------------------------------------------------------------------------|
|     |                                                                                      |                                    |    | 400<br>457<br>318                                                                                                                        | 423<br>486<br>354                                                                                                                           | ELQDIIAILGLDELSEEDRLTVAR<br>GFQLILSGELDGLPEQAFYLVGNID<br>EATAK<br>EGSITSIQAVYVPADDLTPAPAATF<br>AHLDATTVLSR                                                                                                                                                                                                                                                                                                                                                  |
| 964 | Ribulose-1,5-bisphosphate carboxylase/oxygenase large subunit, partial (chloroplast) | <i>Cardiocrinum giganteum</i> var. | 12 | 13<br>444<br>198<br>420<br>2<br>164<br>127<br>300<br>1<br>217<br>427<br>22                                                               | 21<br>451<br>207<br>430<br>12<br>174<br>139<br>314<br>12<br>232<br>443<br>59                                                                | DTDILAAFR<br>EIKFEFEP<br>FLFCAEAIYK<br>EGNEIIREACK<br>LTYYPDYETK<br>NYGRAVYECLR<br>TFQGPPHGIQVER<br>MSGGDHIHSGTVVGK<br>KLTYYPDYETK<br>GHYLNATAGTCEEMIK<br>EACKWSPELAAACEVWK<br>VTPQPGVPPEEAGA AVAAESSTGT<br>WTTVWTDGLTSLDR                                                                                                                                                                                                                                  |
| 299 | ATP synthase CF1 beta subunit, partial (plastid)                                     | <i>Lilium superbum</i>             | 21 | 146<br>146<br>146<br>146<br>146<br>146<br>146<br>146<br>146<br>146<br>146<br>146<br>146<br>146<br>146<br>146<br>146<br>146<br>146<br>146 | 154<br>145<br>205<br>498<br>291<br>390<br>261<br>52<br>246<br>18<br>248<br>277<br>127<br>378<br>109<br>418<br>312<br>73<br>418<br>73<br>354 | LSIFETGIK<br>SAPAFIQLDTK<br>AHGGVSVFGGVGER<br>AMNLEGESNLKK<br>FVQAGSEVSALLGR<br>IVGEEHYEIAQR<br>VGLTALTMAEYFR<br>MPNIYNALVVKGR<br>VALVYGQMNPPGAR<br>INPTTSGLVSTLEEK<br>VALVYGQMNPPGARMR<br>DVNEQDVLLFIDNIFR<br>IFNVLGEPVDNLGPVDTR<br>GIYPAVDPLDSTSTMLQPR<br>GMEVIDTGTPLSVPVGGATLGR<br>ELQDIIAILGLDELSEEDR<br>MPSAVGYQPTLSTEMGSLQER<br>DTVGPQINVTCEVQQLLGNNR<br>YKELQDIIAILGLDELSEEDR<br>GRDTVGPQINVTCEVQQLLGNNR<br>EGSITSIQAVYVPADDLTPAPAATF<br>AHLDATTVLSR |
| 130 | 70 kda heat shock protein                                                            | <i>Sandersonia aurantiaca</i>      | 3  | 234<br>20<br>119                                                                                                                         | 244<br>36<br>141                                                                                                                            | NALENYAYNMR<br>MDKSTVHDVVLVGGSTR<br>EQVFSTYSNQPGLVLIQVYEGER                                                                                                                                                                                                                                                                                                                                                                                                 |
| 633 | NADP-dependent alkenal double bond reductase P2                                      | <i>Morus notabilis</i>             | 7  | 222<br>97<br>2<br>46<br>8<br>46<br>46<br>41                                                                                              | 231<br>108<br>12<br>56<br>20<br>56<br>58<br>56                                                                                              | FGFDEAFNYK<br>TLQPITGYGVAK<br>AEVINKQVLLR<br>NLYLSCDPYMR<br>QVLLRDYVSGSAK<br>NLYLSCDPYMR<br>NLYLSCDPYMRGR<br>GVLVKNLYLSCDPYMR                                                                                                                                                                                                                                                                                                                               |
| 90  | Elongation factor G, mitochondrial                                                   | <i>Medicago truncatula</i>         | 17 | 265<br>554<br>513<br>725<br>582<br>31<br>413<br>551<br>142<br>330<br>159<br>506<br>627<br>690<br>122<br>525                              | 276<br>566<br>524<br>737<br>595<br>42<br>429<br>566<br>158<br>348<br>176<br>524<br>646<br>709<br>141<br>547                                 | AIVWGGEEELGAK<br>VEANVGAPQVNYR<br>LAQEDPSFHFSR<br>VSHKTLSPCAYIK<br>QSGGQGQFADITVR<br>FMGTCFRPVQSR<br>VYSGKLTAGSYVLNSNK<br>EYKVEANVGAPQVNYR<br>GITITSAATTFWDNHR<br>GSIAATFVPMCGSAFKNK<br>INIIDTPGHVDFTLVER<br>MAAGLVKLAQEDPSFHFSR<br>GLEECMSNGVLAGFPVVDVR<br>VEVVTPEEHLGDVIGDLNSR<br>IGEVHEGTATMDWMEQEQR<br>DEEINQTVIEGMGELHLEIIVDR                                                                                                                          |
| 671 | Cysteine synthase                                                                    | <i>Populus</i>                     | 11 | 293                                                                                                                                      | 304                                                                                                                                         | LIVVVFPFSGER                                                                                                                                                                                                                                                                                                                                                                                                                                                |



|     |                                                     |                            |    |                                                                                                                                                                                 |                                                                                                                                                                                   |                                                                                                                                                                                                                                                                                                                                                                                                                                                                                                                                                     |
|-----|-----------------------------------------------------|----------------------------|----|---------------------------------------------------------------------------------------------------------------------------------------------------------------------------------|-----------------------------------------------------------------------------------------------------------------------------------------------------------------------------------|-----------------------------------------------------------------------------------------------------------------------------------------------------------------------------------------------------------------------------------------------------------------------------------------------------------------------------------------------------------------------------------------------------------------------------------------------------------------------------------------------------------------------------------------------------|
|     |                                                     | <i>trichocarpa</i>         |    | 159<br>50<br>265<br>96<br>35<br>114<br>93<br>159<br>242<br>142                                                                                                                  | 170<br>63<br>282<br>109<br>49<br>129<br>108<br>175<br>259<br>158                                                                                                                  | VHYETTGPETIWK<br>DRIGYSMIADAEAK<br>EGLLVGISSGAAAAAVK<br>LIITMPASMSNERR<br>IAAKLEGMEPCSSVK<br>AFGAELVLTNPAKGMK<br>GYKLIITMPASMSNER<br>VHYETTGPETIWKGSQK<br>IVDEVVQISSDEAIETAK<br>TPNAYILQQFENPSNPK                                                                                                                                                                                                                                                                                                                                                   |
| 839 | Putative L-ascorbate peroxidase 2, cytosolic-like   | <i>Solanum chacoense</i>   | 9  | 31<br>39<br>39<br>209<br>192<br>68<br>223<br>172<br>143                                                                                                                         | 38<br>50<br>52<br>222<br>208<br>85<br>240<br>191<br>166                                                                                                                           | NCAPILR<br>LAWHSAGTYDVK<br>LAWHSAGTYDVTKK<br>ALLEDPVFRPLVEK<br>ELLSGEKEGLLQLPSDK<br>HGANNGLDIAVRLLEPIK<br>YAADEDAFFADYAEHLK<br>SGFEGAWTNNPLIFDINSYFK<br>EVFGHMGSLSDKDIVALSGGHTLGR                                                                                                                                                                                                                                                                                                                                                                   |
| 618 | Trypsin-like serine protease                        | <i>Medicago truncatula</i> | 10 | 325<br>419<br>106<br>158<br>188<br>209<br>207<br>226<br>135<br>135                                                                                                              | 333<br>428<br>116<br>169<br>201<br>225<br>225<br>248<br>157<br>169                                                                                                                | VTRPILGIK<br>EKIPVILEPK<br>KLQTDDELATVR<br>DGHIVTNYHVIR<br>VVGFDQDKDVAVLR<br>LRPIPVGVSADLLVGQK<br>DKLRPIPVGVSADLLVGQK<br>VYAIGNPFGLDHTLTGVISGLR<br>QDAFTLDVLEVPQSGSGFVWDK<br>QDAFTLDVLEVPQSGSGFVWDK<br>DGHIVTNYHVIR                                                                                                                                                                                                                                                                                                                                 |
| 182 | Ftsh-like protein pftf                              | <i>Nicotiana tabacum</i>   | 24 | 340<br>660<br>101<br>609<br>338<br>241<br>379<br>241<br>471<br>419<br>457<br>522<br>1<br>197<br>1<br>321<br>630<br>319<br>432<br>220<br>113<br>487<br><br>283<br><br>351<br>580 | 350<br>668<br>109<br>618<br>350<br>251<br>391<br>251<br>484<br>431<br>470<br>537<br>17<br>217<br>18<br>337<br>646<br>337<br>453<br>240<br>134<br>511<br><br>311<br><br>378<br>608 | GTGIGGGNDER<br>ETMTGDEFR<br>FLEYLDKDR<br>MMARNMSEK<br>QRGTGIGGGNDER<br>QDFMEVVEFLK<br>ADILDSALLRGR<br>QDFMEVVEFLK<br>IVAGMEGTVMTDGK<br>FSDVSLEVIAMR<br>TAIASKEIDDSIDR<br>GLTWFIPADDPTLISK<br>MATSSVCIAGNSLSTHR<br>SPGGMGPGPGNPLAFGQSK<br>MATSSVCIAGNSLSTHRR<br>ENAPCIVFVDEIDAVGR<br>LSDSAYEIALTHIRNNR<br>AKENAPCIVFVDEIDAVGR<br>TPGFSGADLANLLNEAAILAGR<br>FQMEPNTGVTFFDDVAGVDEAK<br>VDLFENGTAIVEAISPELGNR<br>SLVAYHEVGHAICGTLTPGHDAVQK<br>AIAGEAGVPFFSISGSEFVEMFVGV<br>GASR<br>EQTLNQLLTEMDFEGNTGHIVVAA<br>TNR<br>QMVVTFGMSELGPWSLMDSSAQS<br>GDVIMR |
| 307 | ATP synthase alpha subunit, partial (mitochondrion) | <i>Lilium lancifolium</i>  | 13 | 133<br>87<br>361<br>120<br>75<br>109<br>144<br>168<br>329<br>261<br>228                                                                                                         | 139<br>94<br>367<br>129<br>86<br>119<br>155<br>178<br>342<br>273<br>242                                                                                                           | ELIIGDR<br>GALSDHER<br>LELAQYR<br>AVDSLVPGR<br>VVDALGVPIDGR<br>SVHEPMQTGLK<br>TAIAIDTILNQK<br>LYCVYVAIGQK<br>GIRPAINVGLSVSR<br>EAFPGDVLYLHSR<br>DNGMHALIYYDLSK                                                                                                                                                                                                                                                                                                                                                                                      |

|     |                                                                                      |                                                         |    |                                                                                                                                   |                                                                                                                                    |                                                                                                                                                                                                                                                                                                                                                                    |
|-----|--------------------------------------------------------------------------------------|---------------------------------------------------------|----|-----------------------------------------------------------------------------------------------------------------------------------|------------------------------------------------------------------------------------------------------------------------------------|--------------------------------------------------------------------------------------------------------------------------------------------------------------------------------------------------------------------------------------------------------------------------------------------------------------------------------------------------------------------|
|     |                                                                                      |                                                         |    | 9<br>368                                                                                                                          | 28<br>389                                                                                                                          | VYGLNEIQAGEMVEFASGVK<br>EVAFAQFGSDLLAATQALLNR                                                                                                                                                                                                                                                                                                                      |
| 313 | Atpb (chloroplast)                                                                   | <i>Lilium distichum</i>                                 | 17 | 393<br>135<br>208<br>192<br>278<br>379<br>249<br>232<br>3<br>1<br>262<br>110<br>360<br>208<br>88<br>292<br>53                     | 399<br>145<br>217<br>205<br>291<br>390<br>261<br>246<br>18<br>18<br>277<br>127<br>378<br>225<br>109<br>312<br>73                   | QTSQRYK<br>SAPAFIQLDTK<br>EGNDLYMEMK<br>AHGGVSVFGGVGER<br>FVQAGSEVSALLGR<br>IVGEEHYEIAQR<br>VGLTALTMAEYFR<br>VALVYGMNEPPGAR<br>INPTTSGLGVSALEEK<br>MRINPTTSGLGVSALEEK<br>DVNEQDVLLFIDNIFR<br>IFNVLGEPVDNLGPVDTR<br>GIYPAVDPLDSTSTMLQPR<br>EGNDLYMEMKESGVINEK<br>GMEVIDTGTPSVVGGATLGR<br>MPSAVGYQPTLSTEMGSLQER<br>DTVGPQINVTCEVQQLLGNRR                             |
| 580 | Glyceraldehyde-3-phosphate dehydrogenase, partial                                    | <i>Lilium regale</i>                                    | 12 | 114<br>261<br>260<br>209<br>56<br>332<br>182<br>33<br>32<br>243<br>318<br>280                                                     | 125<br>271<br>271<br>223<br>68<br>344<br>195<br>48<br>48<br>259<br>331<br>295                                                      | EGAGKHIQAGAK<br>TFAEEVNAAFR<br>KTFAEEVNAAFR<br>AAALNIVPTSTGAAK<br>YDSTLGIFGADVK<br>VVDLADIVANNWK<br>GTMTTTHSYTGDQR<br>DSPLEIIAINDTGGVK<br>KDSPLEIIAINDTGGVK<br>VPTPNVSVVDLVVQVSK<br>VIAWYDNEWGYSQR<br>GILSVCDEPLVSVDFR                                                                                                                                             |
| 349 | Ribulose-1,5-bisphosphate carboxylase/oxygenase large subunit, partial (chloroplast) | <i>Cardiocrinum giganteum</i><br><i>var. Yunmanense</i> | 19 | 168<br>13<br>402<br>284<br>266<br>420<br>320<br>2<br>182<br>127<br>145<br>431<br>431<br>217<br>427<br>320<br>175<br>239<br><br>22 | 174<br>21<br>411<br>292<br>275<br>430<br>330<br>12<br>193<br>139<br>157<br>443<br>446<br>233<br>443<br>336<br>193<br>265<br><br>59 | AVYECLR<br>DTDILAAFR<br>VALEACVQAR<br>QKNHGMHFR<br>DNGLLLHIHR<br>EGNEIIREACK<br>EMTLGFVDLLR<br>LTYYPDPYETK<br>DDENVNSQPFMR<br>TFQGPPHGIQVER<br>YGRPLLGTIKPK<br>WSPELAAACEVWK<br>WSPELAAACEVWKEIK<br>GHYLNATAGTCEEMIKR<br>EACKWSPELAAACEVWK<br>EMTLGFVDLLRDDFIEK<br>GGLDFTKDDENVNSQPFMR<br>ELGVPIVMHDYLTGGFTANTSLSHYCR<br>VTPQPGVPPEEAGAAVAESSTGT<br>WTTVWTDGLTSLDR |
| 489 | Monodehydroascorbate reductase                                                       | <i>Lilium longiflorum</i>                               | 18 | 305<br>53<br>311<br>77<br>27<br>86<br>422<br>40<br>8<br>63<br>391<br>166<br>225<br>287<br>202<br>249<br>184                       | 310<br>62<br>319<br>85<br>39<br>97<br>433<br>52<br>22<br>76<br>405<br>183<br>243<br>304<br>218<br>269<br>201                       | LYNEIR<br>AYLFPQGAAR<br>RVEHVDHAR<br>LLPEWYTEK<br>QGLAPGELAIISK<br>GIELLSTEIVK<br>QLITEGLNFASK<br>EAVAPYERPALSK<br>YIIIGGGVSAGYAAR<br>LPGFHVCVGGGER<br>VVGAFLESGSPDENK<br>AVIVGGGYIGLELGATLK<br>GTVAVGFSDANGDVTAVK<br>TSITDVYAVGDVATFPLK<br>LFTAIEIAFYEGYYANK<br>VLDADIVVVGGRPLTTLFK<br>INNLDVMTMVYEPWCMPR                                                         |

|     |                                                            |                                |    |                                                                                                               |                                                                                                               |                                                                                                                                                                                                                                                                                                                                  |
|-----|------------------------------------------------------------|--------------------------------|----|---------------------------------------------------------------------------------------------------------------|---------------------------------------------------------------------------------------------------------------|----------------------------------------------------------------------------------------------------------------------------------------------------------------------------------------------------------------------------------------------------------------------------------------------------------------------------------|
|     |                                                            |                                |    | 413                                                                                                           | 433                                                                                                           | LQPAVADPKQLITEGLNF                                                                                                                                                                                                                                                                                                               |
| 752 | Photosystem II oxygen evolving complex protein 1 precursor | <i>Fritillaria agrestis</i>    | 16 | 235<br>206<br>89<br>320<br>88<br>235<br>262<br>245<br>243<br>189<br>33<br>214<br>164<br>245<br><br>289<br>189 | 242<br>213<br>97<br>329<br>97<br>242<br>273<br>261<br>261<br>205<br>53<br>234<br>184<br>269<br><br>313<br>213 | GSSFLDPK<br>VPFLFTVK<br>LTFDEIQSK<br>IQGIWYAQLE<br>RLTFDEIQSK<br>GSSFLDPK<br>GDEEELVKENIK<br>GGSAGYDNAVALPAGGR<br>GRGGSAGYDNAVALPAGGR<br>DGIDYAAVTVQLPGGER<br>AFGFDNSTAGRRLTCSINSDLR<br>QLVATGKPESFSGSYLVPSYR<br>LTYTLDEIEGPFVAPDGTVK<br>GGSAGYDNAVALPAGGRGDEEELV<br>K<br>SKPETGEVIGVFESIQPSDSDLGSK<br>DGIDYAAVTVQLPGGERVPFLFTVK |
| 263 | Dihydrolipoyl dehydrogenase                                | <i>Salvia miltiorrhiza</i>     | 6  | 417<br>495<br>482<br>92<br>76<br>290                                                                          | 427<br>507<br>494<br>104<br>91<br>314                                                                         | VGKFPLLANSR<br>EAAMATYDKPIHI<br>TCHAHPTMSEALK<br>ALLHSSHMYHEAK<br>GALGGTCLNVGCIPSK<br>LTIEPAAGGEQTTLEADVVLVSAGR                                                                                                                                                                                                                  |
| 192 | Malic enzyme                                               | <i>Phaseolus angularis</i>     | 9  | 135<br>606<br>252<br>180<br>480<br>630<br>648<br>480<br>2                                                     | 143<br>616<br>263<br>189<br>494<br>643<br>662<br>498<br>20                                                    | GLAFTEGER<br>GLAFTEGER<br>GLAFTEGER<br>GLAFTEGER<br>AIKPTVLIGSSGVGK<br>AYDLGLASHLPRPK<br>YAESCMYSPGYRSYR<br>AIKPTVLIGSSGVGKTFK<br>SHSSGCDVSKTLGLCICER                                                                                                                                                                            |
| 604 | 604                                                        | Fructose-bisphosphate aldolase | 9  | 240<br>204<br>174<br>349<br>282<br>84<br>69<br>83<br>151                                                      | 246<br>211<br>183<br>358<br>293<br>96<br>82<br>96<br>173                                                      | TFEVAQK<br>EAAWGLAR<br>TAAYYQQGAR<br>TWGGRPENVK<br>ATPEQVADYTLK<br>LASIGLENTEANR<br>GILAMDESNATCGK<br>RLASIGLENTEANR<br>GLVPLAGSNDESWCQGLDGLASR                                                                                                                                                                                  |
